# Supplementary material
Source: PubMed Central journal article supplement (PMC7817336)

UNDERSTANDING THE MEANING,  
VALUE, AND USE OF PATIENT-  
REPORTED DATA FOR PERSONAL  
HEALTH RECORDS WITHIN A  
PRIMARY CARE NETWORK IN  
RURAL BC

*“Patients are the most  
under-utilized resource in  
the healthcare system.”*

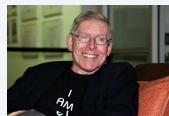

ePatient  
Dave DeBronkart



## Workflow Primer

While InputHealth can act as a standalone EMR replacement, **the workflows in our pilot are based on you having your own EMR running in parallel.**

Recruited patients will need to be created in InputHealth and consented accordingly.

There is no direct connection between InputHealth and your EMR, so if you want to send lab results securely you will need to download them first and then upload into the message.

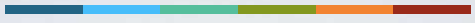

## Functions Available for Pilot Study

- ✓ Allow for eBooking of appointments
- ✓ Send questionnaires, receive results, patients can see results
- ✓ Schedule automated questionnaires, including with alerts if needed
- ✓ Send messages to patients, including attachments (like lab results) -> with the possibility for patients to respond
- ✓ Video call patients

Allow your patient to schedule appointments online.

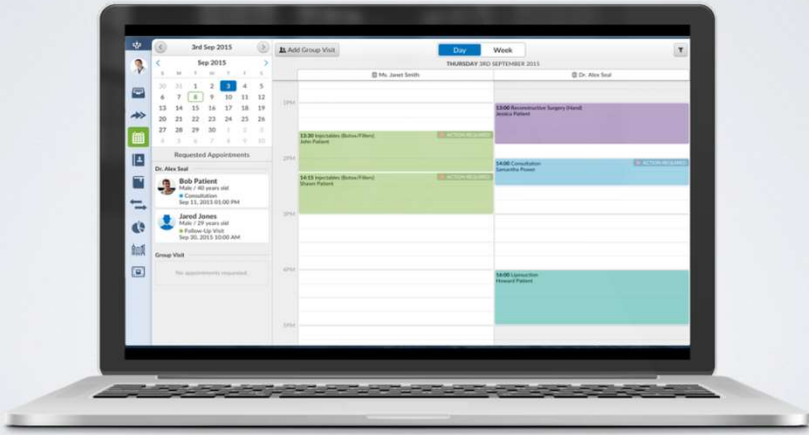

Patients can share trackable data before, during or after encounters.

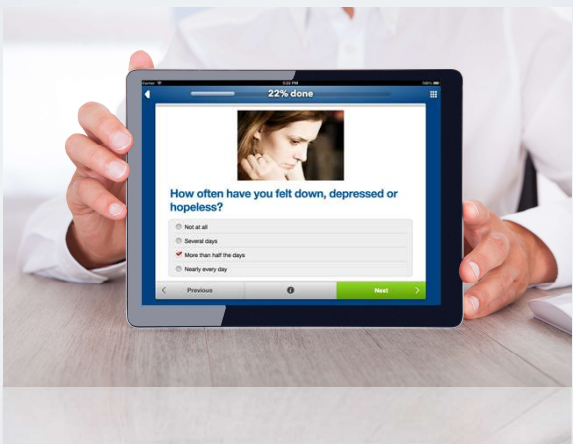

Utilize our library of tools or build your own custom tools with ease.

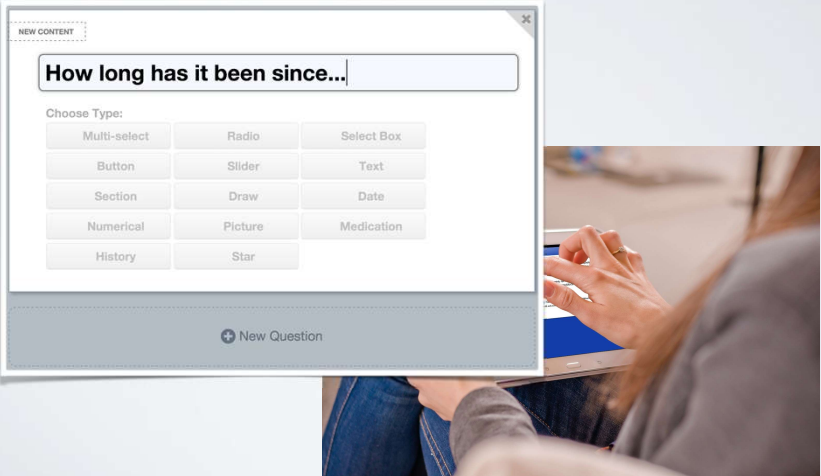

With many different ways to collect patient-generated data.

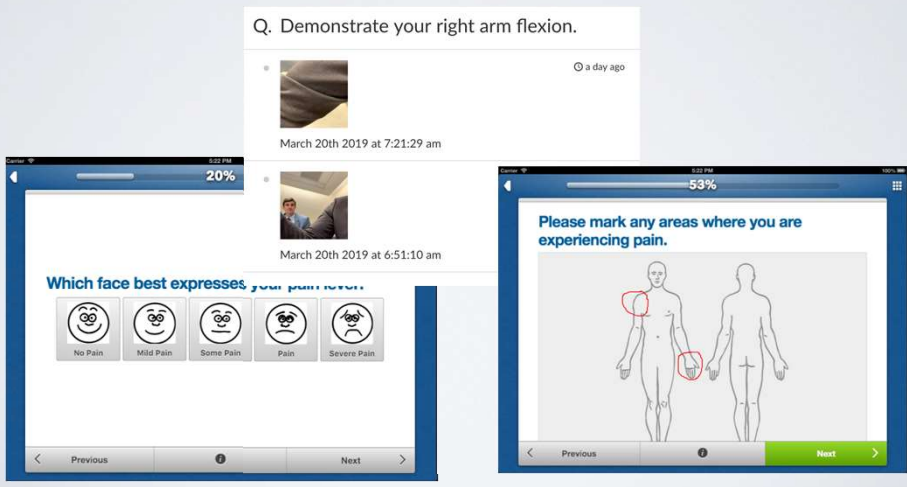

## Schedule automated data collection.

The screenshot shows a web form titled "Edit Scheduled Qnaire" with two tabs: "General" and "Advanced". Under "DELIVERY ROUTINE", the "Weekly" option is selected. The frequency is set to "Every Sunday at 9:30 am" and the end date is "2016-04-01". Under "DELIVERY METHOD", "Email" is selected. The "PRACTITIONER" dropdown is set to "Dr. Ryan Uitti". A list of assessment tools is shown: 1. Depression Self-Assessment (PHQ-9), 2. GAD-7 Screening, Parkinson's Disease Quality of Life (PDQ-8), Parkinson's Annual Check (Abridged), and Question Types. "Close" and "Save" buttons are at the bottom.

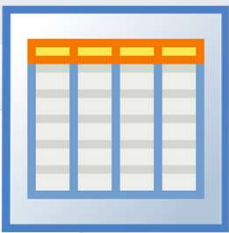

## Utilize outcomes at the point of care.

Outcomes are a communication tool between patient and provider.

The dashboard for "Gerald Walker (Jerry)" displays two assessment results. The "Parkinson's Disease Quality of Life (PDQ-8)" assessment from November 19th, 2015, shows a "Total Score" of 16. The "Depression Self-Assessment (PHQ-9)" assessment from November 19th, 2015, shows a "Total Score" of 19. Both assessments include line graphs showing score trends and a list of "Answers" with frequency indicators (e.g., "Occasionally before Sometimes", "More than half the days").

## Secure Messaging with attachments.

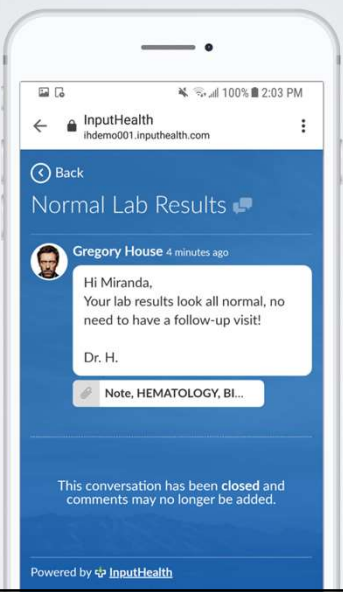

## Video visits done right. Integrated platform which optimizes telehealth outcomes.

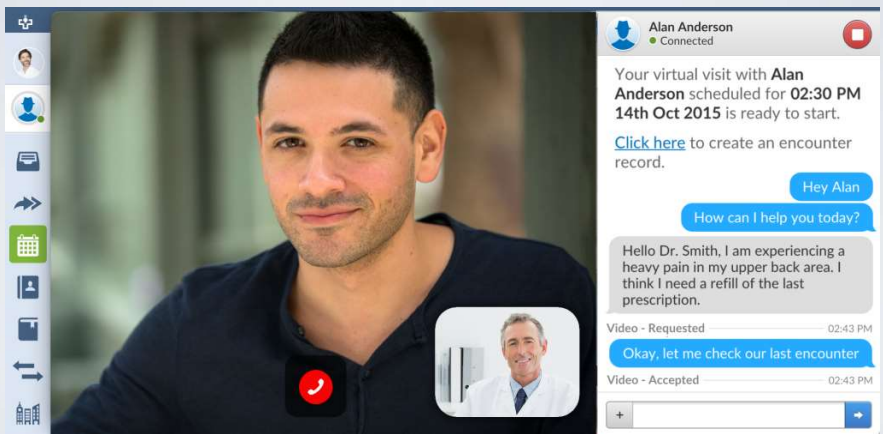

Supplement: 10-1055-s-0040-1721397-s200160ra.pdf [file 10-1055-s-0040-1721397-s200160ra.pdf]
